# Supplementary material for: Exploration of the proton conduction behavior in natural neutral polysaccharides for biodegradable organic synaptic transistors
Source: Royal Society of Chemistry journal article supplement (doi:10.1039/d0tc03842c), 2020-01-01
Supplement: d0tc03842c1.pdf [file d0tc03842c1.pdf]

## **Electronic Supplementary Information**

### **Exploration of Proton Conduction Behavior in Natural Neutral Polysaccharides for Biodegradable Organic Synaptic Transistors**

Yahan Yang, Xiaoli Zhao\*, Shuya Wang, Cong Zhang, Hongying Sun, Fan Xu, Yanhong Tong\*, Qingxin Tang\* and Yichun Liu

Center for Advanced Optoelectronic Functional Materials Research, and Key Laboratory of UV-Emitting Materials and Technology of Ministry of Education, Northeast Normal University, 5268 Renmin Street, Changchun 130024, China.

\*E-mail: tangqx@nenu.edu.cn, zhaoxl326@nenu.edu.cn, tongyh@nenu.edu.cn

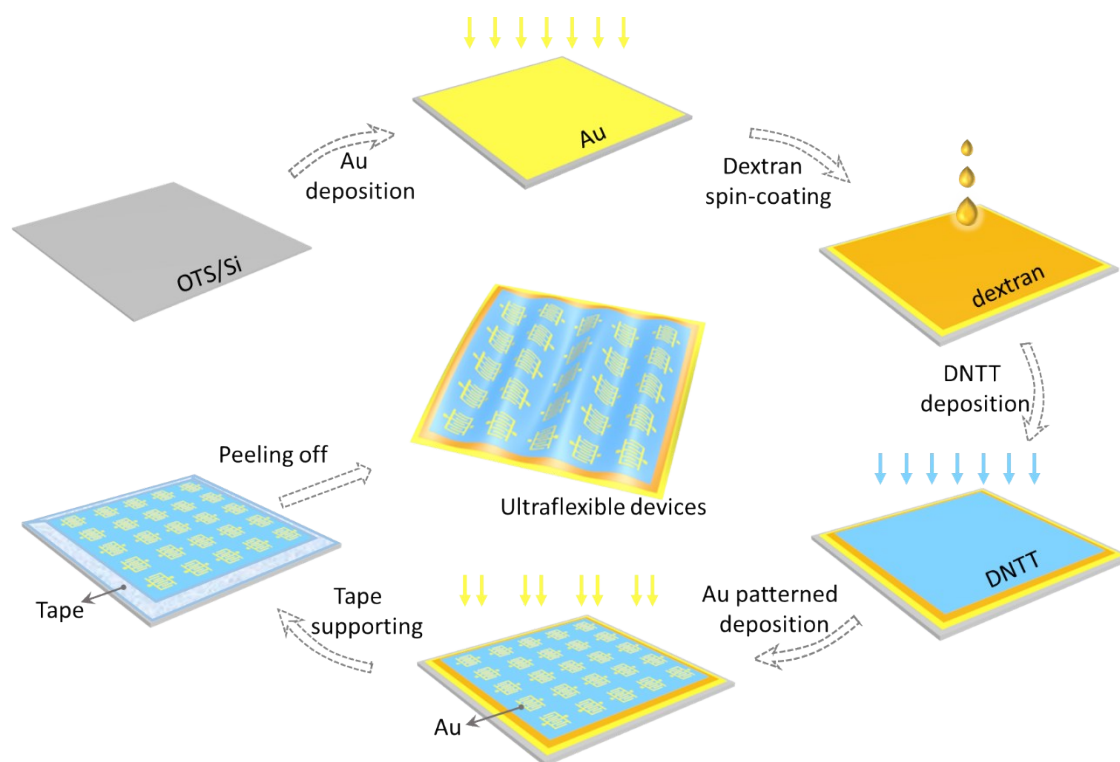

**Fig. S1** The fabrication process of large-scale devices.

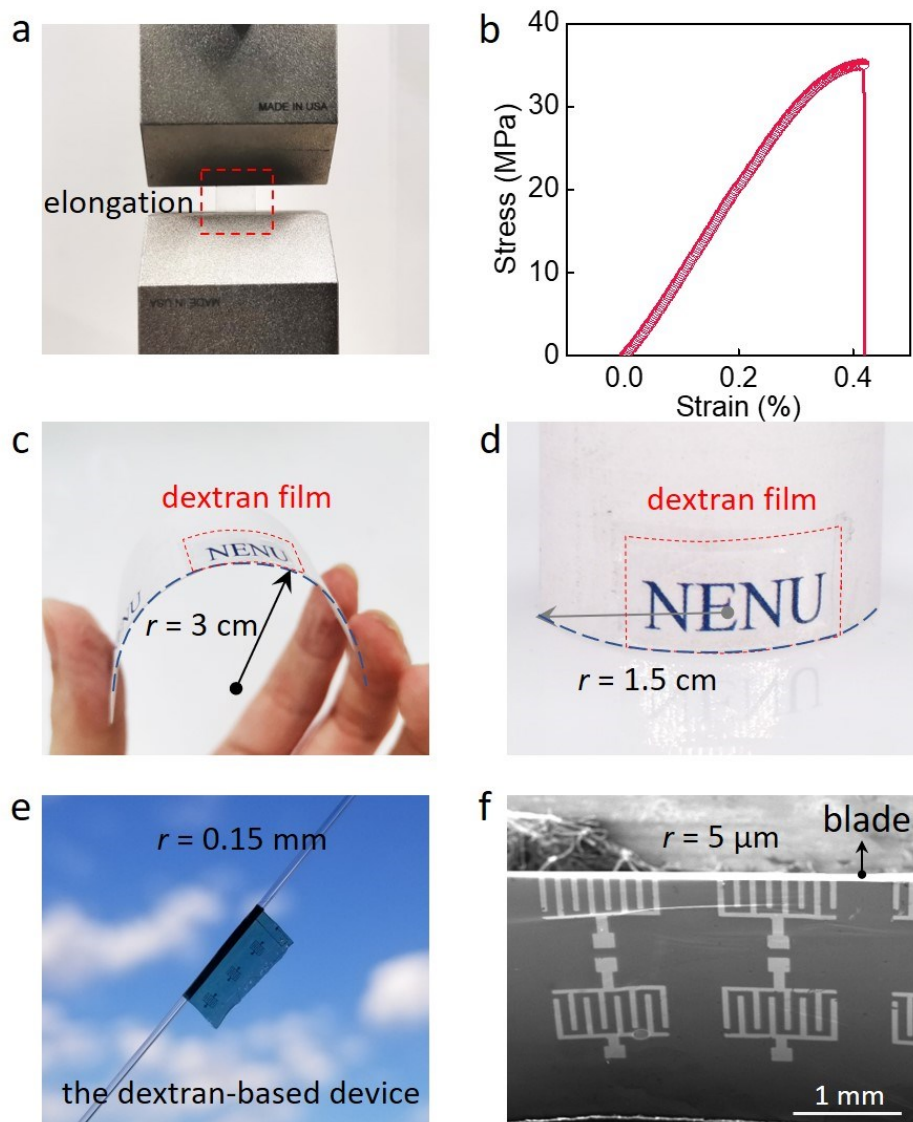

**Fig. S2** (a) Photograph of the stretching dextran film. (b) the stress-strain curves of dextran film. Pictures of dextran films at the bending radii of (c) 3 cm and (d) 1.5 cm. Pictures of the dextran-based devices at the bending radii of (e) 0.15 mm and (d) 5  $\mu\text{m}$ .

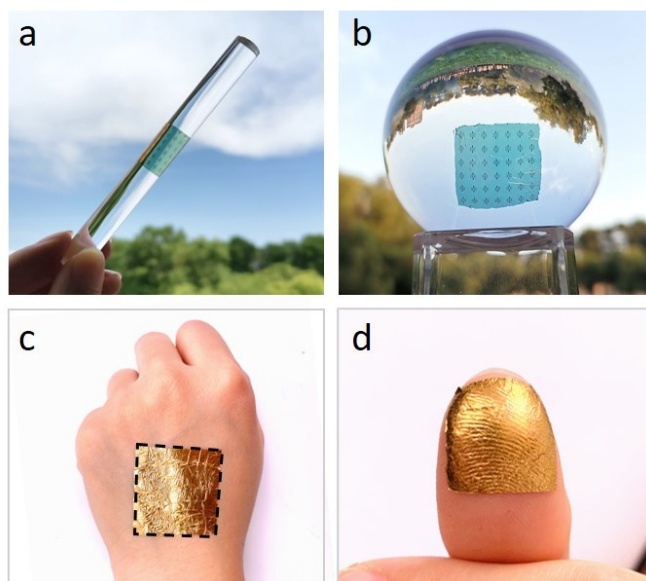

**Fig. S3** The conformality of our devices. Pictures of our ultrathin synaptic devices adhered to (a) a glass rod with a radius of 0.5 cm, (b) a glass sphere with a radius of 2.5 cm, (c) the human hand and (d) a human thumb.

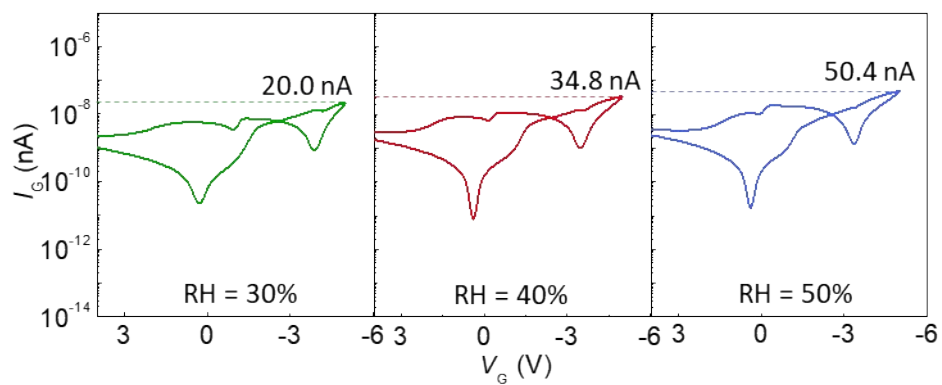

**Fig. S4**  $I_G$ - $V_G$  curves at different RH of 30%,40% and 50%.

**Table S1.** Summary of current ultrathin synaptic transistor and representative OTFTs.

|                      | Thickness (nm) | Substrate | Semiconductor        | Dielectric layer | Ref. |
|----------------------|----------------|-----------|----------------------|------------------|------|
| Synaptic transistors | ~509           | /         | pentacene            | PVDF-TrFE        | [1]  |
| OTFT                 | 274            | PI        | DNTT                 | PI               | [2]  |
| OTFT                 | 320            | /         | pentacene            | PS/PAN           | [3]  |
| OTFT                 | 350            | /         | DNTT                 | PI               | [4]  |
| OTFT                 | 470            | PAN       | pentacene            | PPO              | [5]  |
| OTFT                 | 620            | PI        | TIPS-pentacene/N1400 | AIO <sub>x</sub> | [6]  |
| OTFT                 | 800            | cellulose | PDPP-PD              | AIO <sub>x</sub> | [7]  |
| OTFT                 | 380            | /         | C8-BTBT              | C-PVA            | [8]  |
| OTFT                 | 480            |           | TIPS-pentacene       | c-PVA:PTA        | [9]  |
| OTFT                 | 590            |           | PTCDI-C13            | PMMA/PVA         | [10] |
| OTFT                 | 320            |           | C8-BTBT              | PVA              | [11] |

**References:**

- [1] S. Jang, S. Jang, E. H. Lee, M. Kang, G. Wang, T. W. Kim, *ACS Appl. Mater. Interfaces* 2019, **11**, 1071.
- [2] R. A. Nawrocki, N. Matsuhisa, T. Yokota, T. Someya, *Adv. Electron. Mater.* 2016, **2**, 1500452.
- [3] L. Zhang, H. Wang, Y. Zhao, Y. Guo, W. Hu, G. Yu, Y. Liu, *Adv. Mater.* 2013, **25**, 5455.
- [4] K. Fukuda, T. Sekine, R. Shiwaku, T. Morimoto, D. Kumaki, S. Tokito, *Sci. Rep.* 2016, **6**, 27450.
- [5] H. Wang, H. Liu, Q. Zhao, C. Cheng, W. Hu, Y. Liu, *Adv. Mater.* 2016, **28**, 624Y.
- [6] S. Lai, A. Zucca, P. Cosseddu, F. Greco, V. Mattoli, A. Bonfiglio, *Org. Electron.* 2017, **46**, 60.
- [7] T. Lei, M. Guan, J. Liu, H. C. Lin, R. Pfattner, L. Shaw, A. F. McGuire, T. C. Huang, L. Shao, K. T. Cheng, J. B. Tok, Z. Bao, *Proc. Natl. Acad. Sci. USA* 2017, **114**, 5107.

- [8] H. Ren, N. Cui, Q. X. Tang, Y. H. Tong, X. L. Zhao, Y. C. Liu, *Small* 2018, **14**, 1801020Y.
- [9] Y. Y. Zhou, H. T. Wang, Q. X. Tang, Y. H. Tong, X. L. Zhao, Y. C. Liu, *IEEE Electron Device Lett.* 2018, **39**, 595.
- [10] M. L. Liu, H. T. Wang, Y. H. Tong, X. L. Zhao, Q. X. Tang, Y. C. Liu, *IEEE Electron Device Lett.* 2018, **39**, 1183.
- [11] H. Ren, Q. X. Tang, Y. H. Tong, Y. C. Liu, *Materials* 2017, **10**, 918.
